# Supplementary material for: Conducting systematic reviews of diagnostic studies: didactic guidelines
Source: Springer Nature journal article supplement (doi:10.1186/1471-2288-2-9), 2002-07-03
Supplement: Additional file 1 [file 1471-2288-2-9-s1.doc]

## Appendix: Statistical Formulae

**Ad: Pooling of proportions**

- ***Homogeneous sensitivity and/or specificity***

e.g. for the sensitivity:

whereby a = true positives

c = false negatives

i = study number

k = total number of studies

with standard error:

whereby p = Sensitivitypooled

n =

- ***Cut-off point effect : SROC curve***

Basic meta-regression formula: ln(DOR)pooled =  + S

Whereby  = intercept

 = regression coefficient

S = estimate off cut-off point =

With standard error:

**Ad: Pooling of likelihood ratios**

Whereby LR = likelihood ratio

= correction factor = log (number non-diseased / number diseased)

- = intercept in logistic regression
- = regression coefficient

x = test measurement
